# Supplementary material for: Probing the heterogeneous structure of eumelanin using ultrafast vibrational fingerprinting
Source: PubMed Central journal article supplement (PMC7486937; doi:10.1038/s41467-020-18393-w), 2020-09-11
Supplement: 41467_2020_18393_MOESM2_ESM.pdf [file 41467_2020_18393_MOESM2_ESM.pdf]

**Editorial Note:** This manuscript has been previously reviewed at another journal that is not operating a transparent peer review scheme. The manuscript was considered suitable for publication without further review at *Nature Communications*.
